# Supplementary material for: Fodder and Grain Yield Potential of Little Millet, Panicum sumatrense race robusta and trait-specific genetic resources for crop improvement
Source: Research Square preprint supplement (doi:10.21203/rs.3.rs-7373619/v1), 2025-08-22
Supplement: Supplementary file 1 [file 57bb6b6e34a2f50d26cf1e18.docx]

**Supplementary Table 1. Direct and indirect effects on grain yield of little millet germplasm evaluated at ICRISAT, Hyderabad during 2021 and 2022 Rainy**

|  | **DFL** | **DM** | **PHT (cm)** | **BT** | **FLBL (mm)** | **FLBW (mm)** | **FLSL (mm)** | **PedL (mm)** | **PE (mm)** | **INFL (mm)** | **INFW (mm)** | **IPBL (mm)** | **No. of nodes** | **No. of leaves** | **CT (mm)** | **100 SWt (g)** | **Stover_**  **Wt_**  **fresh__**  **Kg_ha** | **Stover Wt_**  **Kg/ha (dry)** | **HI** | **GY** |
| --- | --- | --- | --- | --- | --- | --- | --- | --- | --- | --- | --- | --- | --- | --- | --- | --- | --- | --- | --- | --- |
| **DFL** | **1.50** | -1.65 | 0.26 | 0.12 | -0.02 | 0.00 | -0.01 | -0.14 | 0.17 | 0.00 | -0.04 | 0.00 | 0.12 | -0.01 | 0.07 | 0.02 | 1.88 | -0.99 | -0.74 | **0.56** |
| **DM** | 1.50 | **-1.65** | 0.26 | 0.12 | -0.02 | 0.00 | -0.01 | -0.14 | 0.17 | 0.00 | -0.04 | 0.00 | 0.12 | -0.01 | -0.07 | 0.02 | 1.88 | -0.98 | -0.74 | **0.43** |
| **PHT (cm)** | 1.11 | -1.22 | **0.35** | 0.12 | -0.01 | 0.00 | -0.02 | -0.25 | 0.30 | 0.00 | 0.00 | 0.00 | 0.13 | -0.01 | -0.08 | -0.03 | 2.08 | -0.99 | -0.89 | **0.59** |
| **BT** | -0.82 | 0.89 | -0.20 | **-0.22** | 0.01 | 0.00 | -0.07 | 0.18 | -0.09 | 0.00 | 0.00 | 0.00 | -0.09 | 0.00 | 0.06 | -0.10 | -0.87 | 0.46 | 0.49 | **-0.36** |
| **FLBL (mm)** | -0.37 | 0.41 | -0.05 | -0.02 | **0.07** | 0.00 | 0.29 | -0.02 | -0.38 | 0.00 | 0.10 | 0.00 | -0.03 | 0.00 | 0.02 | -0.01 | -0.77 | 0.37 | 0.24 | **-0.17** |
| **FLBW (mm)** | 0.61 | -0.64 | 0.17 | 0.09 | 0.00 | **0.00** | 0.09 | -0.21 | 0.09 | 0.00 | 0.01 | 0.00 | 0.06 | 0.00 | -0.06 | 0.00 | 0.94 | -0.50 | -0.40 | **0.25** |
| **FLSL (mm)** | -0.04 | 0.05 | -0.01 | 0.03 | 0.04 | 0.00 | **0.48** | -0.14 | -0.52 | 0.00 | 0.10 | 0.00 | -0.02 | 0.00 | 0.00 | 0.04 | -0.59 | 0.25 | 0.16 | **-0.20** |
| **PedL (mm)** | 0.27 | -0.30 | 0.11 | 0.05 | 0.00 | 0.00 | 0.09 | **-0.76** | 0.68 | 0.00 | 0.03 | 0.00 | 0.03 | 0.00 | -0.03 | -0.01 | 0.57 | -0.30 | -0.26 | **0.18** |
| **PE (mm)** | 0.27 | -0.30 | 0.11 | 0.02 | -0.03 | 0.00 | -0.27 | -0.54 | **0.95** | 0.00 | -0.05 | 0.00 | 0.04 | 0.00 | -0.03 | -0.03 | 0.92 | -0.44 | -0.34 | **0.29** |
| **INFL (mm)** | -0.15 | 0.15 | 0.06 | 0.02 | 0.05 | 0.00 | 0.28 | -0.08 | -0.30 | **0.00** | 0.12 | 0.00 | -0.01 | 0.00 | 0.00 | 0.00 | -0.30 | 0.18 | 0.00 | **0.00** |
| **INFW (mm)** | -0.33 | 0.36 | -0.01 | -0.01 | 0.04 | 0.00 | 0.29 | -0.13 | -0.28 | 0.00 | **0.16** | 0.00 | -0.04 | 0.00 | 0.01 | -0.03 | -0.54 | 0.28 | 0.13 | **-0.08** |
| **IPBL (mm)** | -0.46 | 0.49 | -0.07 | -0.03 | 0.05 | 0.00 | 0.30 | 0.05 | -0.49 | 0.00 | 0.12 | **-0.01** | -0.05 | 0.00 | 0.03 | -0.03 | -0.94 | 0.49 | 0.29 | **-0.25** |
| **NNP** | 1.20 | -1.30 | 0.31 | 0.12 | -0.01 | 0.00 | -0.07 | -0.13 | 0.24 | 0.00 | -0.04 | 0.00 | **0.15** | -0.01 | -0.08 | -0.02 | 2.05 | -1.01 | -0.87 | **0.54** |
| **LPP** | 1.26 | -1.38 | 0.30 | 0.12 | -0.02 | 0.00 | -0.07 | -0.12 | 0.23 | 0.00 | -0.04 | 0.00 | 0.15 | **-0.01** | -0.08 | -0.03 | 2.13 | -1.07 | -0.87 | **0.50** |
| **CT (mm)** | 1.14 | -1.24 | 0.30 | 0.15 | -0.01 | 0.00 | -0.01 | -0.22 | 0.26 | 0.00 | -0.02 | 0.00 | 0.13 | -0.01 | **-0.09** | 0.02 | 1.81 | -0.92 | -0.76 | **0.53** |
| **100 SWt (g)** | -0.13 | 0.15 | 0.03 | -0.08 | 0.00 | 0.00 | -0.07 | -0.02 | 0.10 | 0.00 | 0.02 | 0.00 | 0.01 | 0.00 | 0.01 | **-0.28** | 0.79 | -0.35 | -0.26 | **-0.06** |
| **Stover_Wt_fresh__Kg_ha** | 1.14 | -1.25 | 0.29 | 0.08 | -0.02 | 0.00 | -0.12 | -0.18 | 0.35 | 0.00 | -0.04 | 0.00 | 0.13 | -0.01 | -0.07 | -0.09 | **2.48** | -1.24 | -0.94 | **0.52** |
| **Stover Wt_Kg/ha (dry)** | 1.15 | -1.25 | 0.27 | 0.08 | -0.02 | 0.00 | -0.09 | -0.18 | 0.32 | 0.00 | -0.04 | 0.00 | 0.12 | -0.01 | -0.07 | -0.07 | 2.38 | **-1.29** | -0.87 | **0.44** |
| **HI** | -1.06 | 1.17 | -0.30 | -0.10 | 0.02 | 0.00 | 0.07 | 0.19 | -0.31 | 0.00 | 0.02 | 0.00 | **-0.13** | 0.01 | 0.07 | 0.07 | **-2.25** | 1.08 | **1.04** | **-0.43** |

**Note:** DFL-Days to flowering, DM- days to maturity, PHT (cm) – plant height, BT – basal tillers, FLBL (mm) – flag leaf blade length, FLBW (mm) – flag leaf blade width FLSL (cm) – flag leaf sheath length, PedL (mm) – peduncle length, PE – panicle exertion(mm), INFL (mm) – inflorescence length, INFW (mm) – inflorescence width,IPBL (mm)-inflorescence primary branch length, NPP -nodes per plant, LPP- leaves per plant, CT(mm) – culm thickness, 100 Swt(g) – 100 seed weight, GY (kg/ha)– grain yield, HI – harvest Index
